# Supplementary material
Source: publisher figshare collection journal article supplement (https://tandf.figshare.com/ndownloader/files/14283650)
Supplement: Supplementary file 1 [file 14283650]

# Online Supplement for: Optimal Coinsurance Rates for a Heterogeneous Population under Inequality and Resource Constraints

Greggory J. Schell<sup>1</sup>, Gian-Gabriel P. Garcia<sup>2</sup>, Mariel S. Lavieri<sup>2</sup>, Jeremy B. Sussman<sup>3</sup>,  
Rodney A. Hayward<sup>3</sup>

<sup>1</sup>*Center for Naval Analyses, 3003 Washington Blvd, Arlington, VA 22201, USA*

<sup>2</sup>*Industrial and Operations Engineering, University of Michigan, 1205 Beal Ave, Ann Arbor, MI 48109, USA*

<sup>3</sup>*Center for Clinical Management Research, Ann Arbor Veterans Affairs Hospital, 2215 Fuller Road, Ann Arbor, MI 48105, USA*

schellg@cna.org, garciagg@umich.edu, lavieri@umich.edu, jeremysu@med.umich.edu,  
rhayward@med.umich.edu

## A Model Parameters for Additional Applications

The table below provides the parameters used in the additional applications which considered medium-intensity statins, high-intensity statins, and PCSK9 inhibitors as cholesterol-lowering treatments for cardiovascular risk reduction. Parameters which were identical to the hypertension application in the main paper are not shown.

Table A1: Coinsurance BLP inputs and data sources. All costs reported are in 2015 USD after using appropriate cumulative inflation rates, e.g. 9.9% for 2008 to 2015.

| Input                                                        | Value                   | Source                       |
|--------------------------------------------------------------|-------------------------|------------------------------|
| Risk calculator for cholesterol applications                 | ASCVD                   | (Preiss and Kristensen 2015) |
| Treatment benefit for statins                                | Relative risk reduction | (Baigent et al. 2005)        |
| Treatment benefit for PCSK9 inhibitors                       | Relative risk reduction | (Kazi et al. 2016)           |
| Annual cost of medium-intensity statins                      | \$582                   | Drugs.com                    |
| Annual cost of high-intensity statins                        | \$611                   | Drugs.com                    |
| Annual cost of PCSK9 inhibitors                              | \$14350                 | (Kazi et al. 2016)           |
| Disutility for medium-intensity statins $d_{MS}(\mathbf{s})$ | 0.001                   | (Hayward et al. 2010)        |
| Disutility for high-intensity statins $d_{HS}(\mathbf{s})$   | 0.002                   | (Hayward et al. 2010)        |
| Disutility for PCSK9 inhibitors $d_{PI}(\mathbf{s})$         | 0.0025                  | (Kazi et al. 2016)           |

## References

Drugs.com. <https://www.drugs.com/>. Accessed: 2017-04-12.

Baigent, C., Keech, A., Kearney, P. M., and Blackwell, L. (2005). Efficacy and safety of cholesterol-lowering treatment: prospective meta-analysis of data from 90056 participants in 14 randomised trials of statins. *The Lancet*, 366:1267–1278.

Hayward, R. A., Krumholz, H. M., Zulman, D. M., Timbie, J. W., and Vijan, S. (2010). Optimizing Statin Treatment for Primary Prevention of Coronary Artery Disease. *Annals of Internal Medicine*, 152:69–77.

Kazi, D. S., Moran, A. E., Coxson, P. G., Penko, J., Ollendorf, D. A., Pearson, S. D., Tice, J. A., Guzman, D., and Bibbins-Domingo, K. (2016). Cost-effectiveness of PCSK9 Inhibitor Therapy in Patients With Heterozygous Familial Hypercholesterolemia or Atherosclerotic Cardiovascular Disease. *Journal of the American Medical Association*, 316(7):743–753.

Preiss, D. and Kristensen, S. L. (2015). The new pooled cohort equations risk calculator. *Canadian Journal of Cardiology*, 31(5):613–619.
